# Supplementary material for: Monodispersed vs. polydispersed systems for bulk heterojunction solar cells: the case of dithienopyrrole/anthracene based materials
Source: Royal Society of Chemistry journal article supplement (doi:10.1039/c2jm33795a), 2012-01-01
Supplement: c2jm33795a.pdf [file c2jm33795a.pdf]

ELECTRONIC SUPPLEMENTARY INFORMATION FOR

**Monodispersed vs polydispersed systems for bulk heterojunction solar cells: the case of dithienopyrrole/anthracene based materials**

Roberto Grisorio,<sup>a</sup> Giovanni Allegretta,<sup>a,b</sup> Gian Paolo Suranna,<sup>a\*</sup> Piero Mastrorilli,<sup>a,c</sup> Anna Lojudice,<sup>d,e</sup> Aurora Rizzo,<sup>e,f</sup> Marco Mazzeo<sup>d,f</sup> and Giuseppe Gigli<sup>d,e,f\*</sup>

<sup>a</sup> Department of Water Engineering and of Chemistry, Polytechnic of Bari, Campus Universitario, via Orabona 4, 70125 Bari, Italy. E-mail: surannag@poliba.it

<sup>b</sup> Università del Salento, Scuola Superiore ISUFI, via Monteroni, 73100 Lecce, Italy.

<sup>c</sup> Consiglio Nazionale delle Ricerche, Istituto di Chimica dei Composti Organometallici (ICCOM-CNR), Via Orabona 4, 70125 Bari, Italy.

<sup>d</sup> Dipartimento di Fisica e Matematica "E. De Giorgi", Università del Salento, via Monteroni, 73100 Lecce, Italy. E-mail: giuseppe.gigli@unisalento.it

<sup>e</sup> CBN - Center for Biomolecular Nanotechnologies - Italian Institute of Technology - Energy Platform - Via Barsanti sn - 73010 Arnesano (LE), Italy.

<sup>f</sup> NNL CNR-Istituto Nanoscienze, c/o Distretto Tecnologico, via per Arnesano km 5, 73100 Lecce, Italy.

**BHJ solar cell device tests at different blend composition**

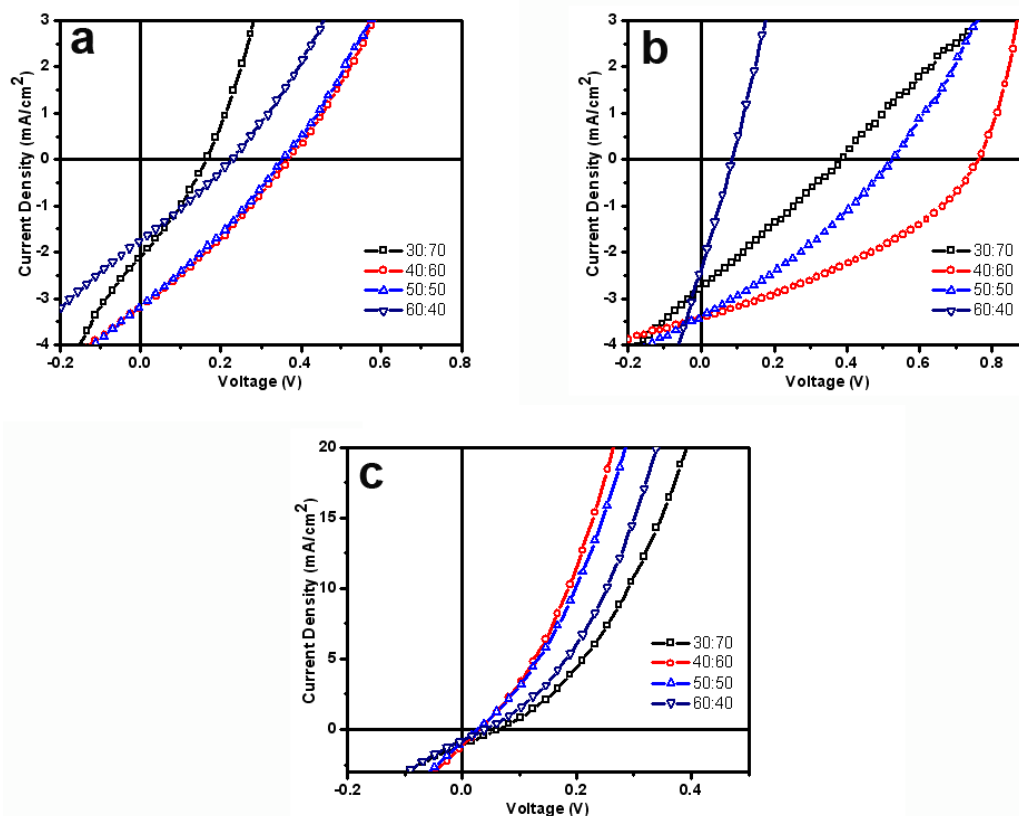

**Figure S1.** Current Density–Voltage characteristics under illumination (AM 1.5G) of devices using ADA, b) DAD and c) polyAD as donor with various donor/PC<sub>61</sub>BM weight ratio (30:70, 40:60, 50:50 and 60:40).

| <b>Donor</b>  | <b>Weight ratio<br/>Donor:PCBM</b> | <b>PCE (%)</b> | <b>FF (%)</b> | <b>V<sub>OC</sub> (V)</b> | <b>J<sub>SC</sub> (mA/cm<sup>2</sup>)</b> |
|---------------|------------------------------------|----------------|---------------|---------------------------|-------------------------------------------|
| <b>ADA</b>    | <b>30:70</b>                       | 0.11           | 31            | 0.17                      | 2.09                                      |
|               | <b>40:60</b>                       | 0.34           | 31            | 0.36                      | 3.07                                      |
|               | <b>50:50</b>                       | 0.32           | 29            | 0.35                      | 3.05                                      |
|               | <b>60:40</b>                       | 0.11           | 29            | 0.23                      | 1.70                                      |
| <b>DAD</b>    | <b>30:70</b>                       | 0.29           | 27            | 0.39                      | 2.69                                      |
|               | <b>40:60</b>                       | 0.95           | 36            | 0.78                      | 3.37                                      |
|               | <b>50:50</b>                       | 0.55           | 31            | 0.53                      | 3.33                                      |
|               | <b>60:40</b>                       | 0.05           | 25            | 0.08                      | 2.37                                      |
| <b>polyAD</b> | <b>30:70</b>                       | 0.02           | 25            | 0.06                      | 1.00                                      |
|               | <b>40:60</b>                       | 0.03           | 25            | 0.03                      | 1.12                                      |
|               | <b>50:50</b>                       | 0.01           | 25            | 0.03                      | 0.92                                      |
|               | <b>60:40</b>                       | 0.01           | 25            | 0.04                      | 0.79                                      |

---

**Table S1.** Performance parameters of BHJ solar cells embodying **ADA**, **DAD** and **polyAD** as donors with various donor/PC<sub>61</sub>BM weight ratio.
